# Supplementary material for: Extended N-Terminal Acetyltransferase Naa50 in Filamentous Fungi Adds to Naa50 Diversity
Source: MDPI journal article supplement (doi:10.3390/ijms231810805), 2022-09-16
Supplement: s1 [file s1]

## Supplementary materials

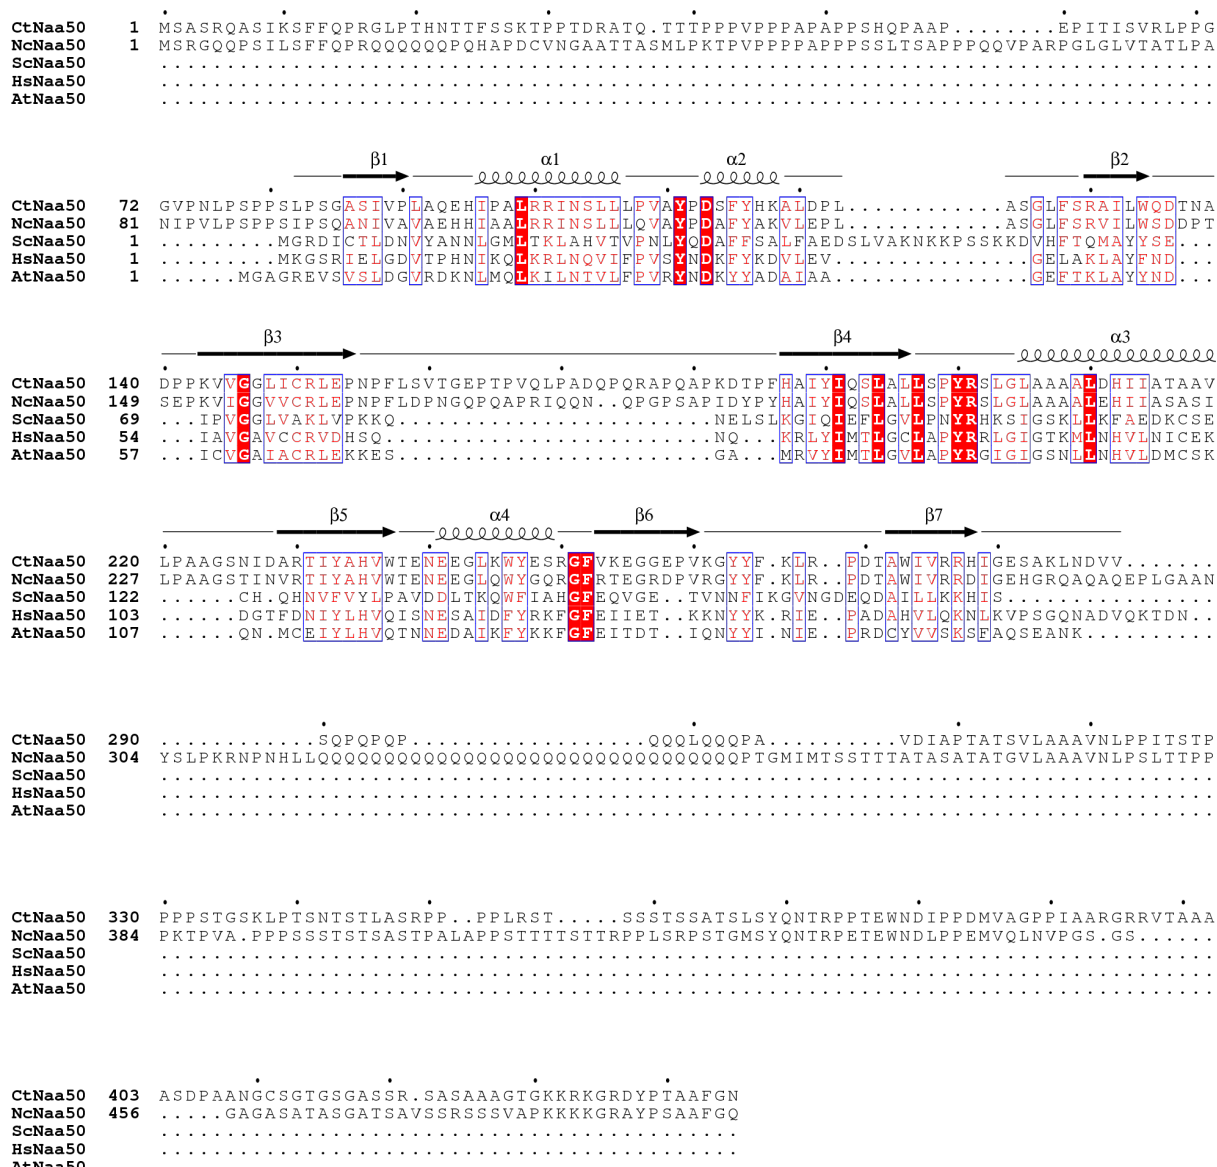

**Supplementary Figure S1.** Multiple sequence alignment of Naa50 from different species. Naa50 from *Chaetomium thermophilum* (Ct), *Neurospora crassa* (Nc), *Saccharomyces cerevisiae* (Sc), *Homo sapiens* (Hs), and *Arabidopsis thaliana* (At) show an overall high conservation for the GNAT-domain (framed by arrows). Secondary structure elements and boundaries from the GNAT-domain construct CtNaa50<sub>82-289</sub> are shown on top. *C. thermophilum* and *N. crassa* Naa50 have elongated termini. Fully conserved residues are represented as white letters in red boxes. Similarities are shown with red letters in blue frames. The sequence alignment was performed using Clustal Omega and visualized using ESPript 3.0 [56; 57].

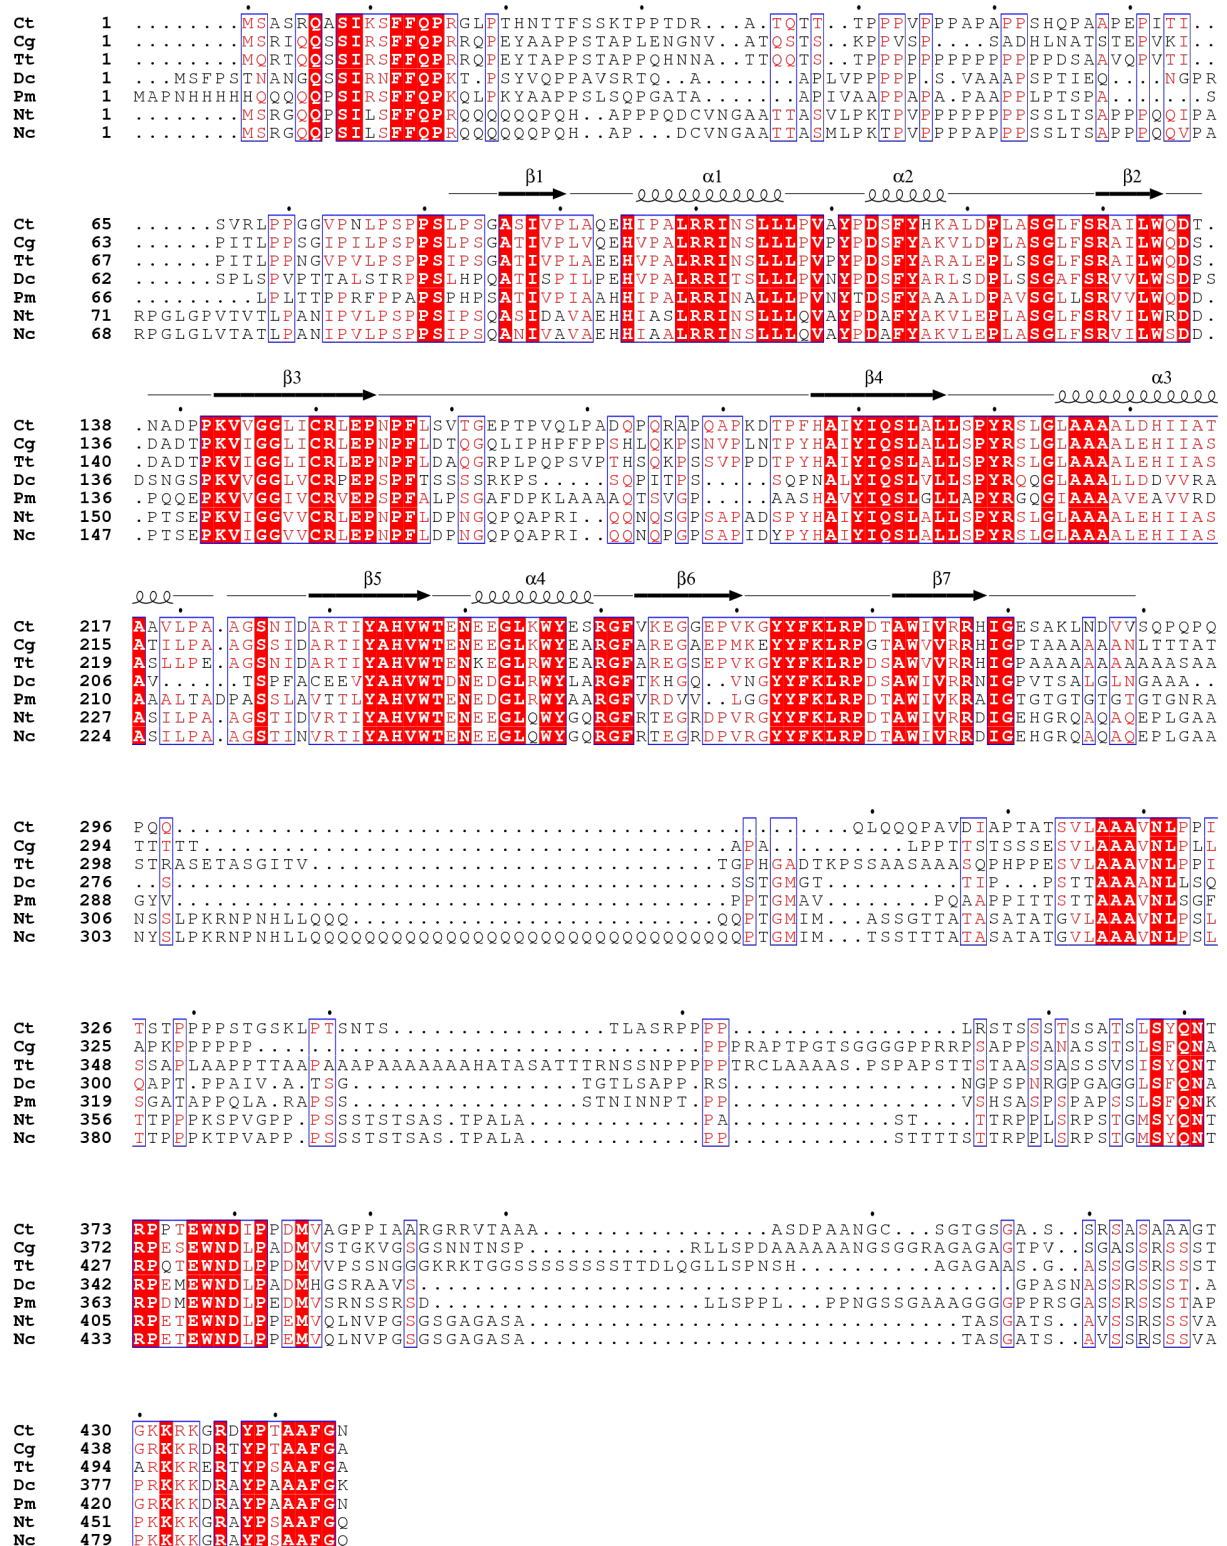

**Supplementary Figure S2.** Multiple sequence alignment of elongated Naa50. Naa50 candidates from *Chaetomium thermophilum* (Ct), *Chaetomium globosum* (Cg), *Thermothelomyces thermophilus* (Tt), *Daldinia childiae* (Dc), *Phaeoacremonium minimum* (Pm), *Neurospora tetrasperma* (Nt), and *Neurospora crassa* (Nc) show an overall high conservation. Secondary structure elements and boundaries from the GNAT-domain construct CtNaa50<sub>82-289</sub> are shown on top. Fully conserved residues are represented as white letters in red boxes. Similarities are shown with red letters in blue frames. The sequence alignment was performed using Clustal Omega and visualized using ESPrnt 3.0 [56; 57].

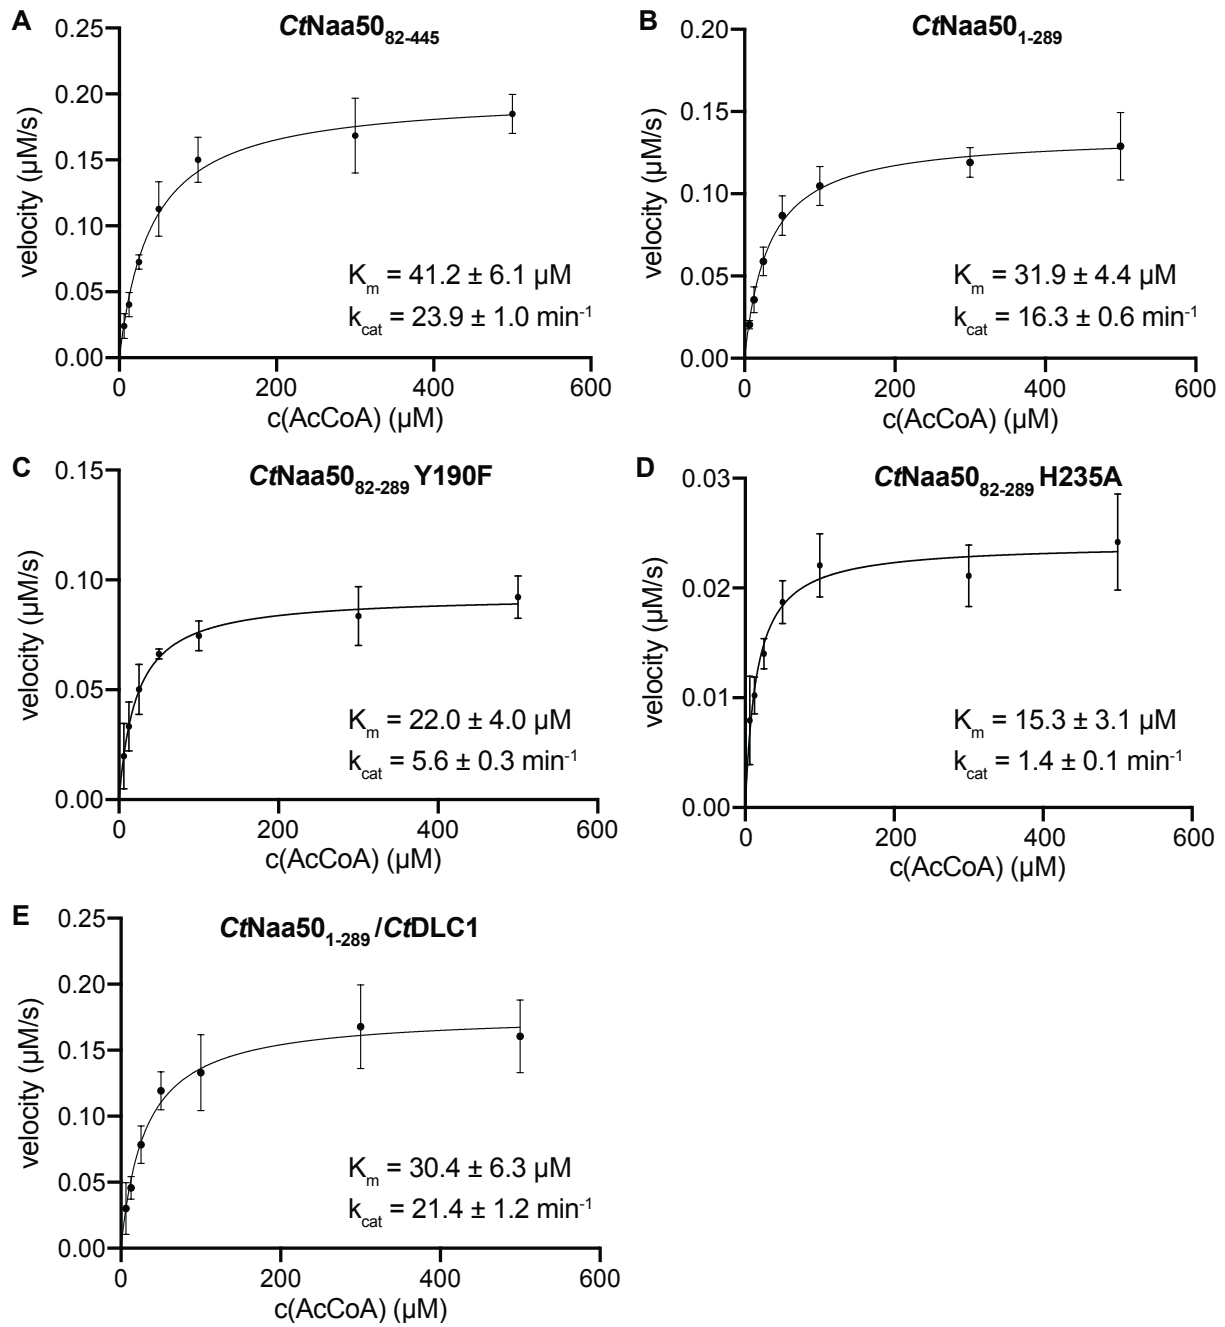

**Supplementary Figure S3.** Michaelis-Menten kinetics for the acetylation of MVNALE by several *CtNaa50* variants with increasing AcCoA concentrations. (A) *CtNaa50*<sub>82-445</sub> ( $\Delta\text{N}$ ) and (B) *CtNaa50*<sub>1-289</sub> ( $\Delta\text{C}$ ) have similar parameters and feature only a slightly reduced activity compared to the GNAT construct *CtNaa50*<sub>82-289</sub>. (C) *CtNaa50*<sub>82-289</sub> Y190F and (D) *CtNaa50*<sub>82-289</sub> H235A mutants have a reduced activity. (E) *CtNaa50*<sub>1-289</sub>/*CtDLC1* complex acetylates MVNALE similar to *CtNaa50*<sub>1-289</sub> alone. All measurements were performed in triplicates and are presented as mean  $\pm$  SD.

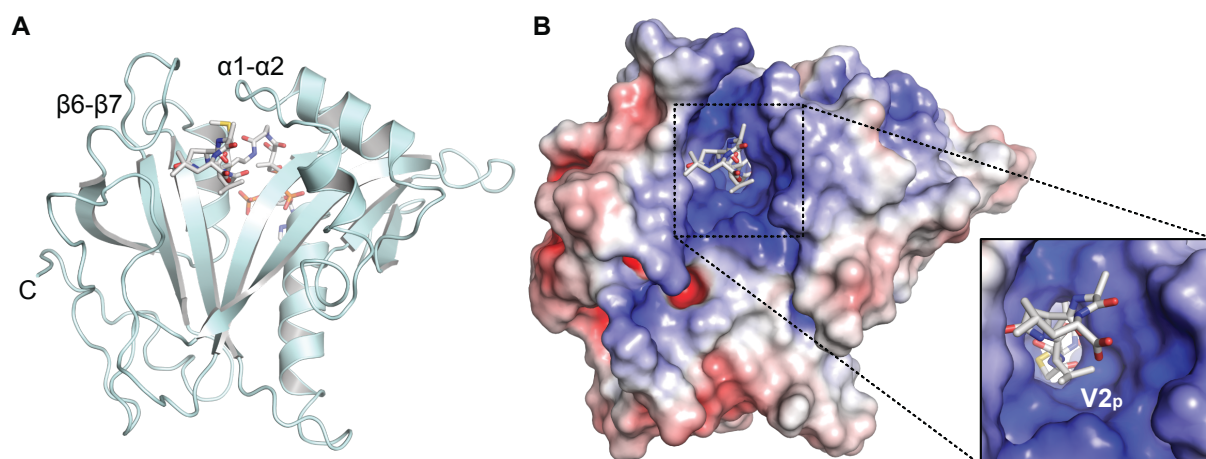

**Supplementary Figure S4.** *CtNaa50*<sub>82-289</sub> binding pocket for V2<sub>p</sub> has a positive surface potential. (A) The structure of *CtNaa50*<sub>82-289</sub> (teal) in complex with CoA-Ac-MVNAL in cartoon and sticks representation with view on the substrate peptide binding site. (B) Electrostatic surface potential representation of *CtNaa50*<sub>82-289</sub> with focus on the substrate peptide binding site and zoom-in on the substrate peptide's second position V2<sub>p</sub> with surroundings. Electrostatics are represented in a gradient from negative (red, -5 kT/e) to positive (blue, +5 kT/e).



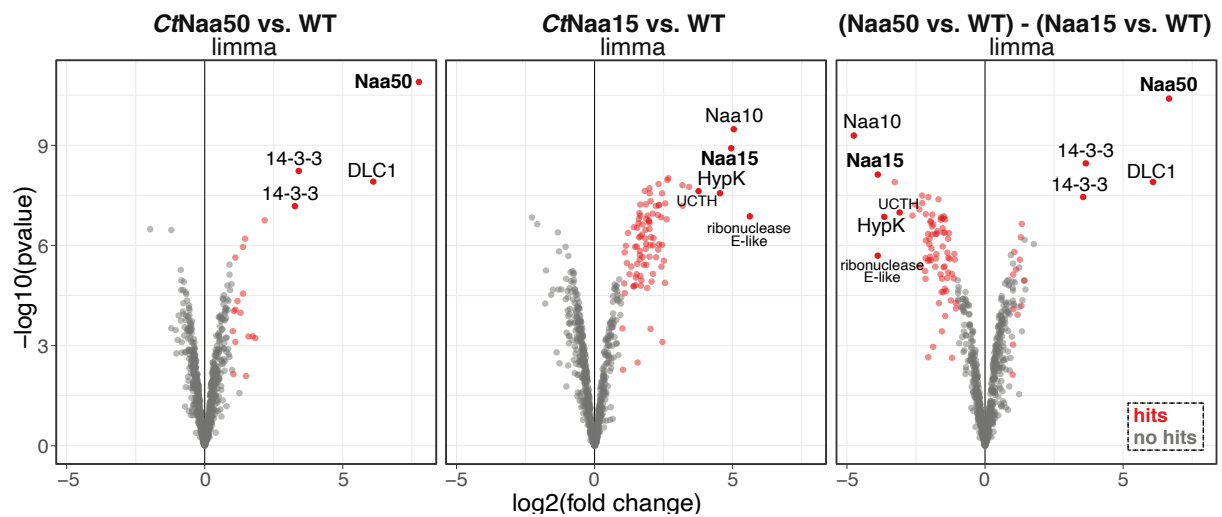

**Supplementary Figure S5.** Volcano plots of *CtNaa50* and *CtNaa15* pull-outs versus wild type control from TMT-labeled LC-MS/MS. *CtNaa50* (left) pull-outs result in additional enrichment of putative dynein light chain 1 protein (NCBI identifier CTHT\_0058240), and two hypothetical 14-3-3 proteins (CTHT\_0054160, CTHT\_0054410). *CtNaa15* (middle) pull-outs result in enrichment of Naa10 (CTHT\_0063490), HypK (CTHT\_0058830), ubiquitin carboxyl-terminal hydrolase-like protein (UCTH, CTHT\_0063590), and an uncharacterized protein (CTHT\_0074400; ribonuclease E-like). The comparison between the two pull-outs (right) highlights that NatA subunits and Naa50 are exclusively found in their respective pull-outs, indicating absent interaction between *CtNaa50* and the *CtNatA* subunits. Bold protein labels indicate the tagged proteins. Wild type (WT) data represent mock-purified proteins without any tag to account for the background level of unspecifically bound proteins. All measurements were performed in triplicates.

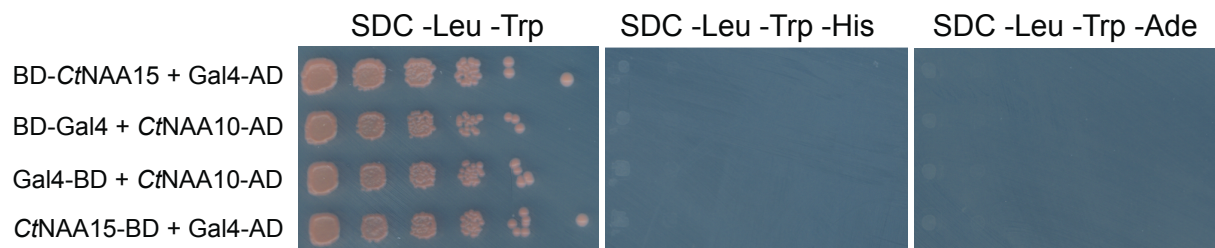

**Supplementary Figure S6.** Yeast two-hybrid *CtNAA10* and *CtNAA15* self-activation controls. There is no self-activation observable for *CtNAA15* or *CtNAA10* with the respective Gal4 activation (AD) or binding domains (BD) as negative controls. Growth on SDC -Leu/-Trp indicates successful transformation.

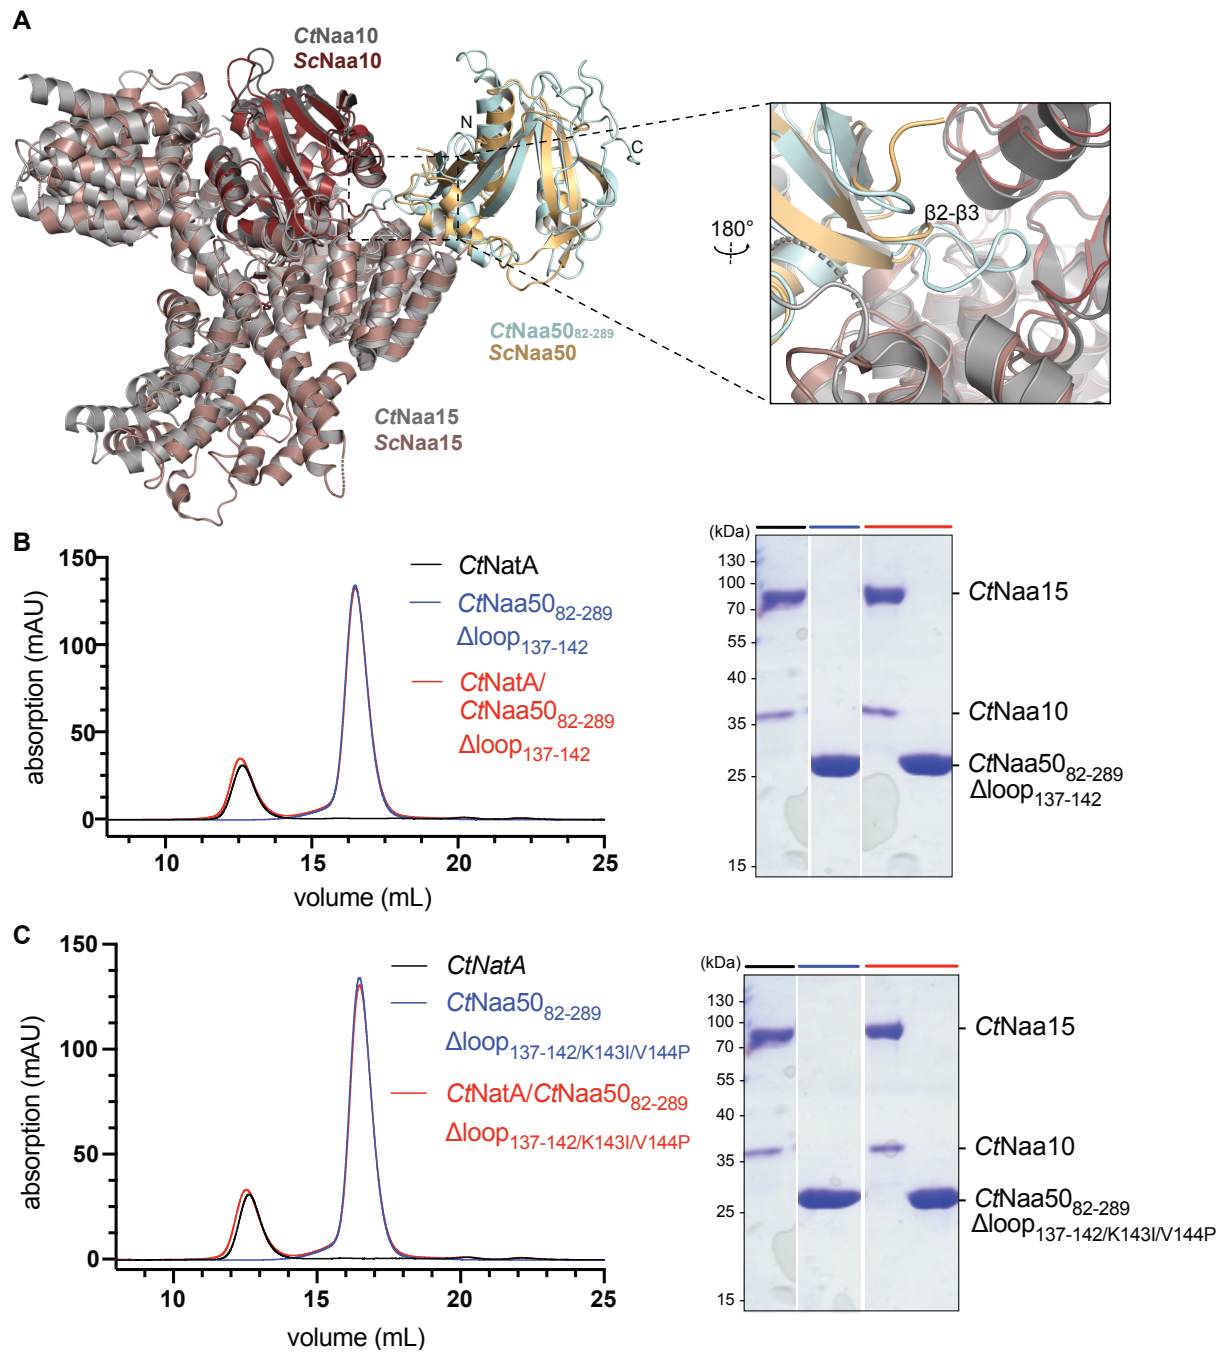

**Supplementary Figure S7.** *CtNaa50*<sub>82-289</sub> does not bind to *CtNatA*. **(A)** Superimposition of *CtNaa50*<sub>82-289</sub> on *ScNaa50*, as well as *CtNatA* (PDB identifier 5NNP, [29]) on *ScNatA* in the *ScNatE* complex (PDB identifier 4XNH) shows that – given a similar interaction as in *ScNatE* – the longer *CtNaa50*<sub>82-289</sub> loop β2-β3 would clash with *NatA*. **(B)** *CtNaa50*<sub>82-289</sub> Δloop<sub>137-142</sub> mutant does not co-elute with *CtNatA* from an analytical size-exclusion column (Superdex 200 10/300 GL, GE Healthcare). **(C)** *CtNaa50*<sub>82-289</sub> Δloop<sub>137-142</sub>/K143I/V144P mutant does not co-elute with *CtNatA* from an analytical size-exclusion column (Superdex 200 10/300 GL, GE Healthcare). Mutating *CtNaa50*<sub>82-289</sub> loop β2-β3 does not lead to *NatA* binding.

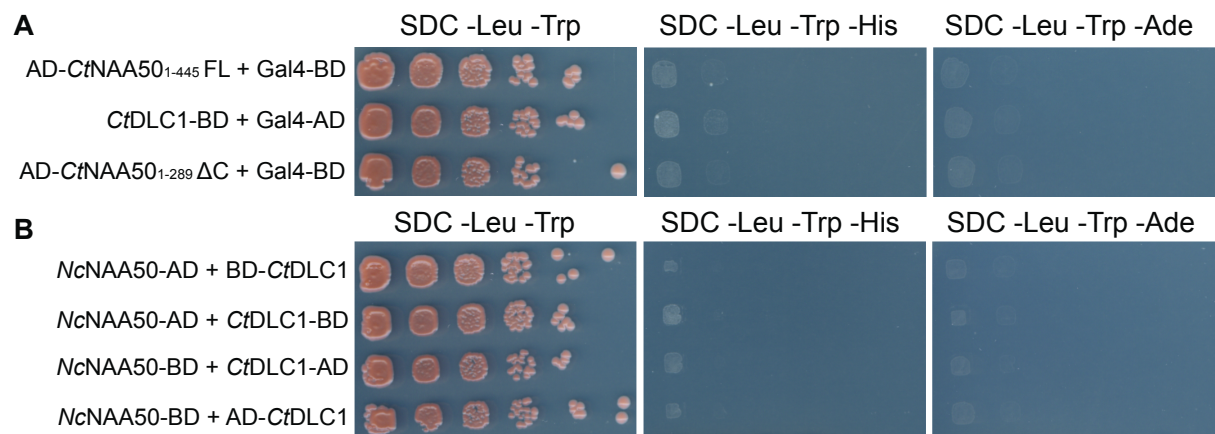

**Supplementary Figure S8.** Yeast two-hybrid *CtNAA50* and *CtDLC1* self-activating controls and *NcNAA50/CtDLC1* interaction assays. **(A)** There is no self-activation observable for *CtNAA50*<sub>1-445</sub> (FL), *CtNAA50*<sub>1-289</sub> (ΔC), or *CtDLC1* with the respective Gal4 activation (AD) or binding domains (BD) as negative controls. **(B)** *NcNAA50*<sub>1-494</sub> (full length) does not interact with *CtDLC1* in various orientations of Gal4 activation (AD) or binding domains (BD). Growth on SDC -Leu/ -Trp indicates successful transformation.

**Supplementary Table S1.** List of used oligonucleotides for cloning, and mutagenesis. Oligonucleotide sequences are in 5'-3' orientation. Names of the oligonucleotides also list their features. F = forward primer, R = reverse primer. Restriction enzymes (e.g., NcoI) and affinity tags for purification (His = hexahistidine, strep = strep2, Flag tags) were introduced. Δ identifies amino acid deletion constructs, either N-terminal, C-terminal or internal deletions. noStop oligonucleotides were used to remove the stop codon. polyA mutagenesis primers were used to mutate amino acid patches completely to alanine residues.

| Name with features                 | Sequence 5'-3'                                               |
|------------------------------------|--------------------------------------------------------------|
| <b>Cloning</b>                     |                                                              |
| <i>CtDLC1_His_BamHI_R</i>          | CGCGGATCCCTAATGGTGATGGTGATGGTGCTGGGTCTTGAACAGCAAGATG         |
| <i>CtDLC1_BamHI_R</i>              | CGCGGATCCCTACTGGGTCTTGAACAGCAAG                              |
| <i>CtDLC1_NcoI_F</i>               | CATGCCATGGGTAAAGAGCGACGAGAAGAAGAGC                           |
| <i>CtDLC1_noStop_BamHI_R</i>       | CGCGGATCCCTGGGTCTTGAACAGCAAGATG                              |
| <i>CtNAA10_BamHI_R</i>             | CGCGGATCCCTATGTATGCTTACTCTCATCCCTC                           |
| <i>CtNAA10_Flag_BamHI_R</i>        | GCGGGATCCTTACTTGTGTCGTCATCGTCTTTGTAGTCTGTATGCTTACTCTCATCCCTC |
| <i>CtNAA10_NcoI_F</i>              | CATGCCATGGACATCCGCCTCTCTCC                                   |
| <i>CtNAA15_NcoI_F</i>              | CATGCCATGGGCCCGCAGCCACTGAGTACG                               |
| <i>CtNAA15_noStop_BamHI_R</i>      | CGCGGATCCGGCGCCAGGCACACCAAC                                  |
| <i>CtNAA15_strep_BamHI_R</i>       | GCGGGATCCTTACTTTTCGAACTGCGGGTGGCTCCAGGCGCCAGGCACACCAAC       |
| <i>CtNAA15_BamHI_R</i>             | CGGGATCCGGCGCCAGGCACACCAAC                                   |
| <i>CtNAA50_BamHI_R</i>             | CGCGGATCCTTAATTCCCAAACGCCGAGTAG                              |
| <i>CtNAA50_ΔC156_BamHI_R</i>       | CGCGGATCCTTACACAACATCATTAGCTTCGCG                            |
| <i>CtNAA50_ΔC156_His_BamHI_R</i>   | CGCGGATCCTTAATGGTGATGGTGATGGTGACACAACATCATTAGCTTCGCG         |
| <i>CtNAA50_ΔN81_NcoI_F</i>         | CATGCCATGGGACTCCCTCTGGCGCAAGC                                |
| <i>CtNAA50_His_BamHI_R</i>         | CGCGGATCCTTAATGGTGATGGTGATGGTGATTCCCAAACGCCGAGTAG            |
| <i>CtNAA50_NcoI_F</i>              | CATGCCATGGGATCTGCCTCCCGCCAGGC                                |
| <i>CtNAA50_ΔC156_strep_BamHI_R</i> | CGCGGATCCTTACTTTTCGAACTGCGGGTGGCTCCACACAACATCATTAGCTTCGCG    |
| <i>CtNAA50_ΔN81_Flag_NcoI_F</i>    | CATGCCATGGACTACAAAGACGATGACGACAAGCTCCCTCTGGCGCAAGC           |
| <i>CtNAA50_FL_Flag_NcoI_F</i>      | CATGCCATGGACTACAAAGACGATGACGACAAGATGTCTGCCTCCCGCCAGG         |
| <i>CtNAA50_FL_strep_BamHI_R</i>    | CGCGGATCCTTACTTTTCGAACTGCGGGTGGCTCCAATTCCCAAACGCCGAGTAGG     |
| <i>CtNAA50_NdeI_F</i>              | GGAATTCCATATGTCTGCCTCCCGCCAGGC                               |
| <i>NcNAA50_BamHI_R</i>             | CGGGATCCCTACTGCCCAAAGCAGCACTAGG                              |
| <i>NcNAA50_NcoI_F</i>              | CATGCCATGGCTTCGCGTGGTCAACAACCTC                              |
| <i>NcNAA50_ΔC206_His_BamHI_R</i>   | CGGGATCCCTAATGGTGATGGTGATGGTGTCATGTCTCTACGCACAATCC           |
| <i>NcNAA50_ΔN92_NcoI_F</i>         | CATGCCATGGCTTCGCAAGCCAACATAGTCGC                             |
| <i>YFP_Flag_NcoI_F</i>             | CATGCCATGGACTACAAAGACGATGACGACAAGATGGGCAAAGTGAGCAAGGG        |
| <i>YFP_strep_BamHI_R</i>           | GCGGGATCCTTACTTTTCGAACTGCGGGTGGCTCCACTTGTACAGCTCGTCCATGC     |
| <b>Mutagenesis</b>                 |                                                              |
| <i>CtNAA50_Δ137-142+_F</i>         | AATTCTCTGGCAAGACATACCGGTGCGCGGTCTGATCT                       |
| <i>CtNAA50_Δ137-142+_R</i>         | AGATCAGACCGCCGACCGGTATGTCTTGCCAGAGAATT                       |
| <i>CtNAA50_Δ137-142_F</i>          | GACCGCCGACCACCTTGTCTTGCCAGAGAATT                             |
| <i>CtNAA50_Δ137-142_R</i>          | AATTCTCTGGCAAGACAAGGTGGTGGCGGTC                              |
| <i>CtNAA50_DLC1motif_polyA_F</i>   | AAAACCCCTCCACAGACGCCGAGCTGCAGCCGCCACACCGCCGCTGTCC            |
| <i>CtNAA50_DLC1motif_polyA_R</i>   | GGACAGGCGGCGGTGTGGCGGCTGCAGCTGCGGCGTCTGTGGGAGGGGTTTT         |
| <i>CtNAA50_H235A_F</i>             | TGCAAGGACGATTTATGCCGCTGTGTGGACAGAAAATGAG                     |
| <i>CtNAA50_H235A_R</i>             | CTCATTTTCTGTCCACACAGCGGCATAAATCGTCCTTGCA                     |
| <i>CtNAA50_Y190F_F</i>             | CCCCGTTTCATGCGATTTTATCCAGAGTTTGGCT                           |
| <i>CtNAA50_Y190F_R</i>             | AGCCAAACTCTGGATAAAAAATCGCATGAAACGGGG                         |

**Supplementary Table S2.** List of plasmids. Plasmid backbones with their features are listed with different inserts for the coding sequences of all constructs. Superscript <sup>R</sup> identifies resistances. Δ represents deletion constructs. His<sub>6</sub> is a hexahistidine tag. Plasmids follow the convention plasmid::insert in the main text (e.g., pET21d::CtDLC1).

| Plasmid        | Features                                                                                                                                                                                                        | Inserts                                                                                                                                                                                                                                                                                                                                                                                                       |
|----------------|-----------------------------------------------------------------------------------------------------------------------------------------------------------------------------------------------------------------|---------------------------------------------------------------------------------------------------------------------------------------------------------------------------------------------------------------------------------------------------------------------------------------------------------------------------------------------------------------------------------------------------------------|
| pET21d         | <i>E. coli</i> expression under T7 promoter, Amp <sup>R</sup>                                                                                                                                                   | CtDLC1, CtDLC1-His <sub>6</sub> , CtNaa10-Flag                                                                                                                                                                                                                                                                                                                                                                |
| pET24d         | <i>E. coli</i> expression under T7 promoter, Kan <sup>R</sup>                                                                                                                                                   | CtNaa10-His <sub>6</sub> , CtNaa15, CtNaa50 <sup>82-289</sup> -H235A-His <sub>6</sub> , CtNaa50 <sup>82-289</sup> -His <sub>6</sub> , CtNaa50 <sup>82-289</sup> -Y190F-His <sub>6</sub> , CtNaa50 <sup>82-289</sup> -Δ137-142_K143I_V144P-His <sub>6</sub> , CtNaa50 <sup>82-289</sup> -Δ137-142-His <sub>6</sub> , CtNaa50 <sup>82-445</sup> -His <sub>6</sub> , NcNaa50 <sup>93-287</sup> -His <sub>6</sub> |
| pETNHis1a      | <i>E. coli</i> expression under T7 promoter, N-terminal hexahistidine tag, TEV protease cleavage site, Kan <sup>R</sup>                                                                                         | CtNaa15-strep2, Flag-CtNaa50 <sup>82-289</sup> -strep2, Flag-CtNaa50 <sup>82-445</sup> -strep2, Flag-YFP-strep2                                                                                                                                                                                                                                                                                               |
| pG4BDN22       | <i>S. cerevisiae</i> Y2H, ADH1 promoter, NLS signal, N-terminal GAL4 binding domain (BD), Amp <sup>R</sup> and TRP1 nutritional marker (Trp <sup>+</sup> )                                                      | CtDLC1, CtNaa15, CtNaa50, CtNaa50-polyA:34-39, CtNaa50 <sup>1-289</sup> , CtNaa50 <sup>82-289</sup> , CtNaa50 <sup>82-445</sup>                                                                                                                                                                                                                                                                               |
| pG4BDC22       | <i>S. cerevisiae</i> Y2H, ADH1 promoter, NLS signal, C-terminal GAL4 binding domain (BD), Amp <sup>R</sup> and TRP1 nutritional marker (Trp <sup>+</sup> )                                                      | CtDLC1, CtNaa10, CtNaa15, CtNaa50, CtNaa50-polyA:34-39, CtNaa50 <sup>1-289</sup> , CtNaa50 <sup>82-289</sup> , CtNaa50 <sup>82-445</sup> , NcNaa50                                                                                                                                                                                                                                                            |
| pG4ADHAN111    | <i>S. cerevisiae</i> Y2H, ADH1 promoter, NLS signal, N-terminal GAL4 activation domain (AD), Amp <sup>R</sup> and LEU2 nutritional marker (Leu <sup>+</sup> )                                                   | CtDLC1, CtNaa15, CtNaa50, CtNaa50-polyA:34-39, CtNaa50 <sup>1-289</sup> , CtNaa50 <sup>82-289</sup> , CtNaa50 <sup>82-445</sup>                                                                                                                                                                                                                                                                               |
| pG4ADC111      | <i>S. cerevisiae</i> Y2H, ADH1 promoter, NLS signal, C-terminal GAL4 activation domain (AD), Amp <sup>R</sup> and LEU2 nutritional marker (Leu <sup>+</sup> )                                                   | CtDLC1, CtNaa10, CtNaa50, CtNaa50-polyA:34-39, CtNaa50 <sup>1-289</sup> , CtNaa50 <sup>82-289</sup> , CtNaa50 <sup>82-445</sup> , NcNaa50                                                                                                                                                                                                                                                                     |
| pRS426         | <i>S. cerevisiae</i> Y3H, ADH1 promoter, NLS signal, Amp <sup>R</sup> and URA3 nutritional marker (Ura <sup>+</sup> )                                                                                           | CtNaa10                                                                                                                                                                                                                                                                                                                                                                                                       |
| pMT929NHis1a   | <i>S. cerevisiae</i> expression under GAL1/GAL10 promoter, N-terminal hexahistidine tag, TEV protease cleavage site, Amp <sup>R</sup> and TRP1, LEU2 nutritional markers (Trp <sup>+</sup> , Leu <sup>+</sup> ) | CtNaa50 <sup>1-289</sup>                                                                                                                                                                                                                                                                                                                                                                                      |
| pRSF-duet-FTpA | <i>C. thermophilum</i> expression under actin promoter, C-terminal Flag-tag > TEV protease site > protein A-tag, Amp <sup>R</sup> and terbinafine <sup>R</sup> (erg1 gene)                                      | CtNaa15                                                                                                                                                                                                                                                                                                                                                                                                       |
| pRSF-duet-pAFT | <i>C. thermophilum</i> expression under actin promoter, N-terminal protein A-tag > TEV protease site > Flag-tag, Amp <sup>R</sup> and terbinafine <sup>R</sup> (erg1 gene)                                      | CtNaa50                                                                                                                                                                                                                                                                                                                                                                                                       |



**Supplementary Table S3.** List of *Chaetomium thermophilum* strains. Strain names, genotypes, and their source are listed below.

| Strain                             | Genotype                                      | Source     |
|------------------------------------|-----------------------------------------------|------------|
| <i>C. thermophilum</i> (La Touche) | wild type: DSMZ#1495                          | [88]       |
| <i>C. thermophilum</i> FTpA-NAA15  | <i>P-ACTIN:ERG1:T-GPD; P-NAA15-FTpA:T-GPD</i> | this study |
| <i>C. thermophilum</i> NAA50-FTpA  | <i>P-ACTIN:ERG1:T-GPD; P-FTpA-NAA50:T-GPD</i> | this study |

**References** in supplementary materials follow the numbering in the main article:

29. Weyer, F.A., Gumiero, A., Lapouge, K., Bange, G., Kopp, J., and Sinning, I. (2017). Structural basis of HypK regulating N-terminal acetylation by the NatA complex. *Nat Commun* 8, 15726. 10.1038/ncomms15726
56. Madeira, F., Park, Y.M., Lee, J., Buso, N., Gur, T., Madhusoodanan, N., Basutkar, P., Tivey, A.R.N., Potter, S.C., Finn, R.D., *et al.* (2019). The EMBL-EBI search and sequence analysis tools APIs in 2019. *Nucleic Acids Res* 47, W636-W641. 10.1093/nar/gkz268
57. Robert, X., and Gouet, P. (2014). Deciphering key features in protein structures with the new ENDscript server. *Nucleic Acids Res* 42, W320-324. 10.1093/nar/gku316
88. Amlacher, S., Sarges, P., Flemming, D., van Noort, V., Kunze, R., Devos, D.P., Arumugam, M., Bork, P., and Hurt, E. (2011). Insight into structure and assembly of the nuclear pore complex by utilizing the genome of a eukaryotic thermophile. *Cell* 146, 277-289. 10.1016/j.cell.2011.06.039
